# Supplementary material for: Phosphocatalytic Kinome Activity Profiling of Apoptotic and Ferroptotic Agents in Multiple Myeloma Cells
Source: Int J Mol Sci. 2021 Nov 25;22(23):12731. doi: 10.3390/ijms222312731 (PMC8657914; doi:10.3390/ijms222312731)
Supplement: Supplementary file 1 [file ijms-22-12731-s001.zip › ijms-1417519-supplementary.pdf]

## Supplementary Materials

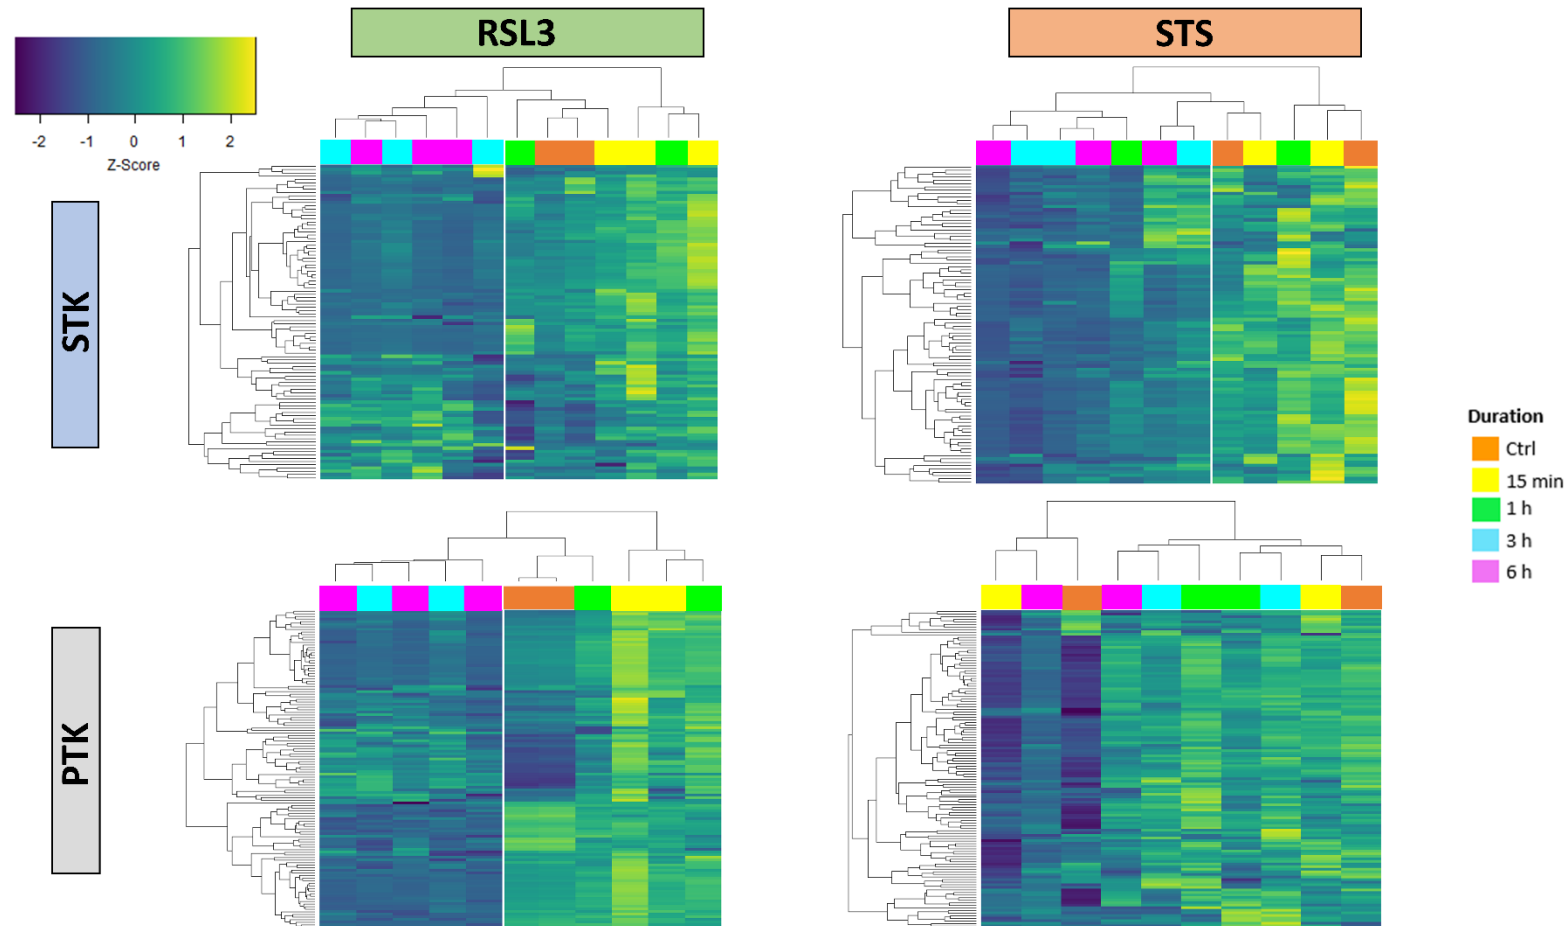

**Figure S1.** Heatmap visualization of individual phosphorylation intensities, represented as normalized z-scores, of peptides on serine/threonine kinase (STK) (upper panel) or tyrosine kinase (PTK) (lower panel) chips which serve as substrates for serine/threonine or tyrosine kinases, respectively. Higher z-scores (yellow) indicate kinase activation while lower z-scores (dark blue) indicate kinase inhibition. MM1R cells were treated with either 5  $\mu$ M RSL3 (left panel) or 1  $\mu$ M STS (right panel) for increasing timepoints, as indicated by the figure legend.

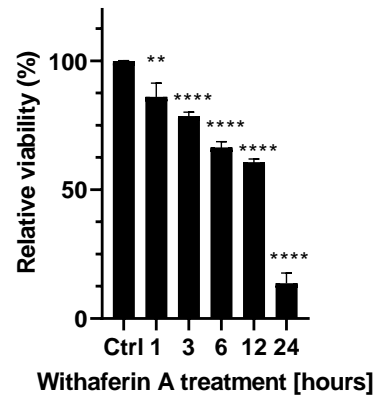

**Figure S2.** Relative cell viability (%) of MM1R cells treated with 1  $\mu$ M WA. Data are presented as the mean  $\pm$  s.d., n=3 biologically independent samples per treatment (\*\*p < 0.01, \*\*\*\*p < 0.0001, ANOVA).

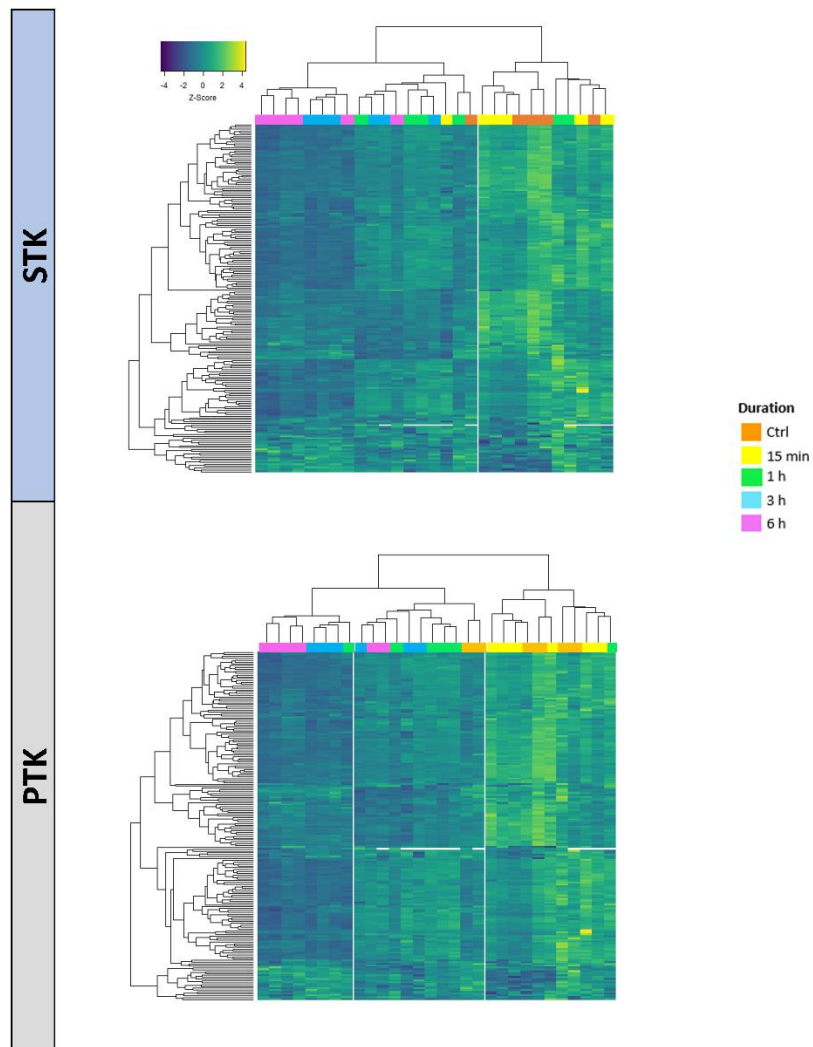

**Figure S3.** Heatmap visualization of individual phosphorylation intensities, represented as normalized z-scores, of peptides on serine/threonine kinase (STK) (upper panel) or tyrosine kinase (PTK) (lower panel) chips which serve as substrates for serine/threonine or tyrosine kinases, respectively. Higher z-scores (yellow) indicate kinase activation while lower z-scores (dark blue) indicate kinase inhibition. MM1R cells were treated with 1  $\mu$ M Withaferin A for increasing timepoints, as indicated by the figure legend.

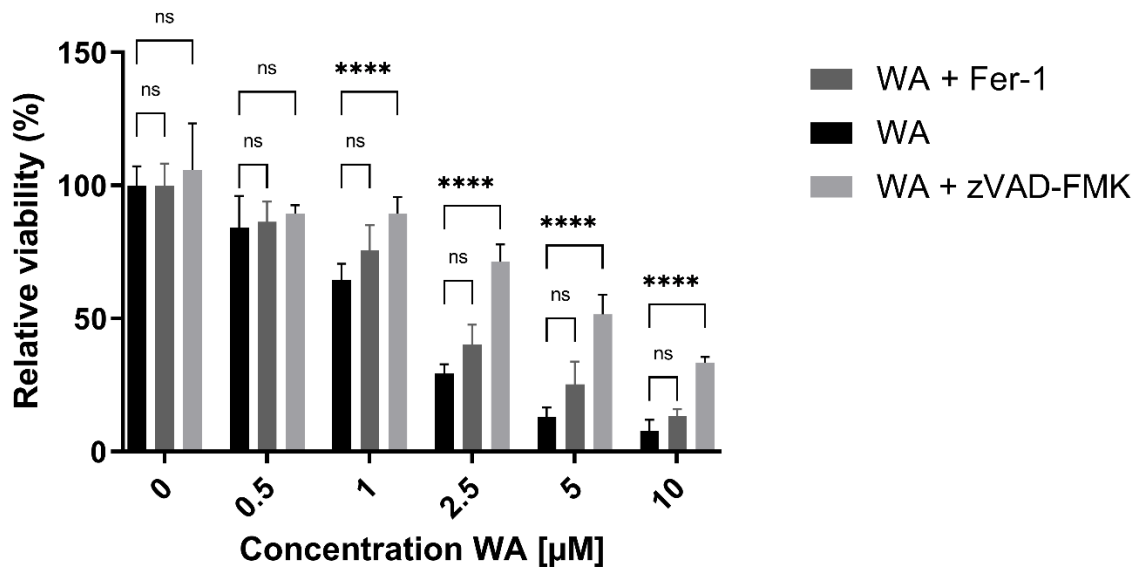

**Figure S4.** Relative cell viability (%) of MM1R cells treated with 1  $\mu$ M WA for 24 hours with or without 2 hour pre-treatment with 2  $\mu$ M ferrostatin-1 (Fer-1) or 50  $\mu$ M zVAD-FMK. Data are presented as the mean  $\pm$  s.d.,  $n=3$  biologically independent samples per treatment (ns  $p > 0.05$ , \*\*\*\* $p < 0.0001$ , ANOVA).

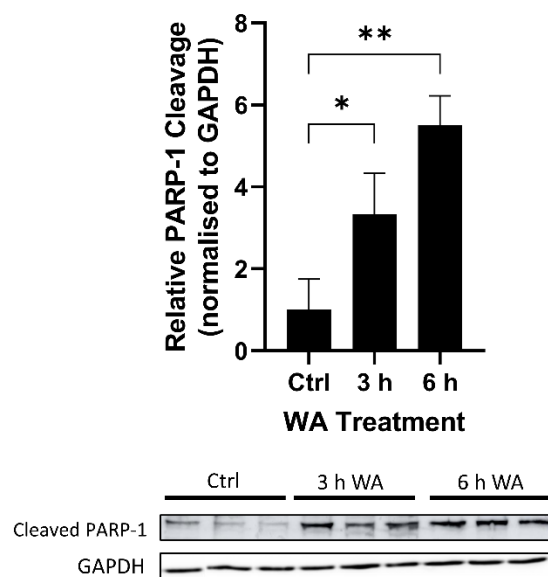

**Figure S5.** Western blot detection and quantification of PARP-1 cleavage and GAPDH expression levels in MM1R cells treated with 1  $\mu$ M withaferin a (WA) for 3 and 6 hrs. All data are presented as the mean  $\pm$  s.d.,  $n=3$  biologically independent samples per treatment (\* $p < 0.05$ , \*\* $p < 0.01$ , ANOVA).

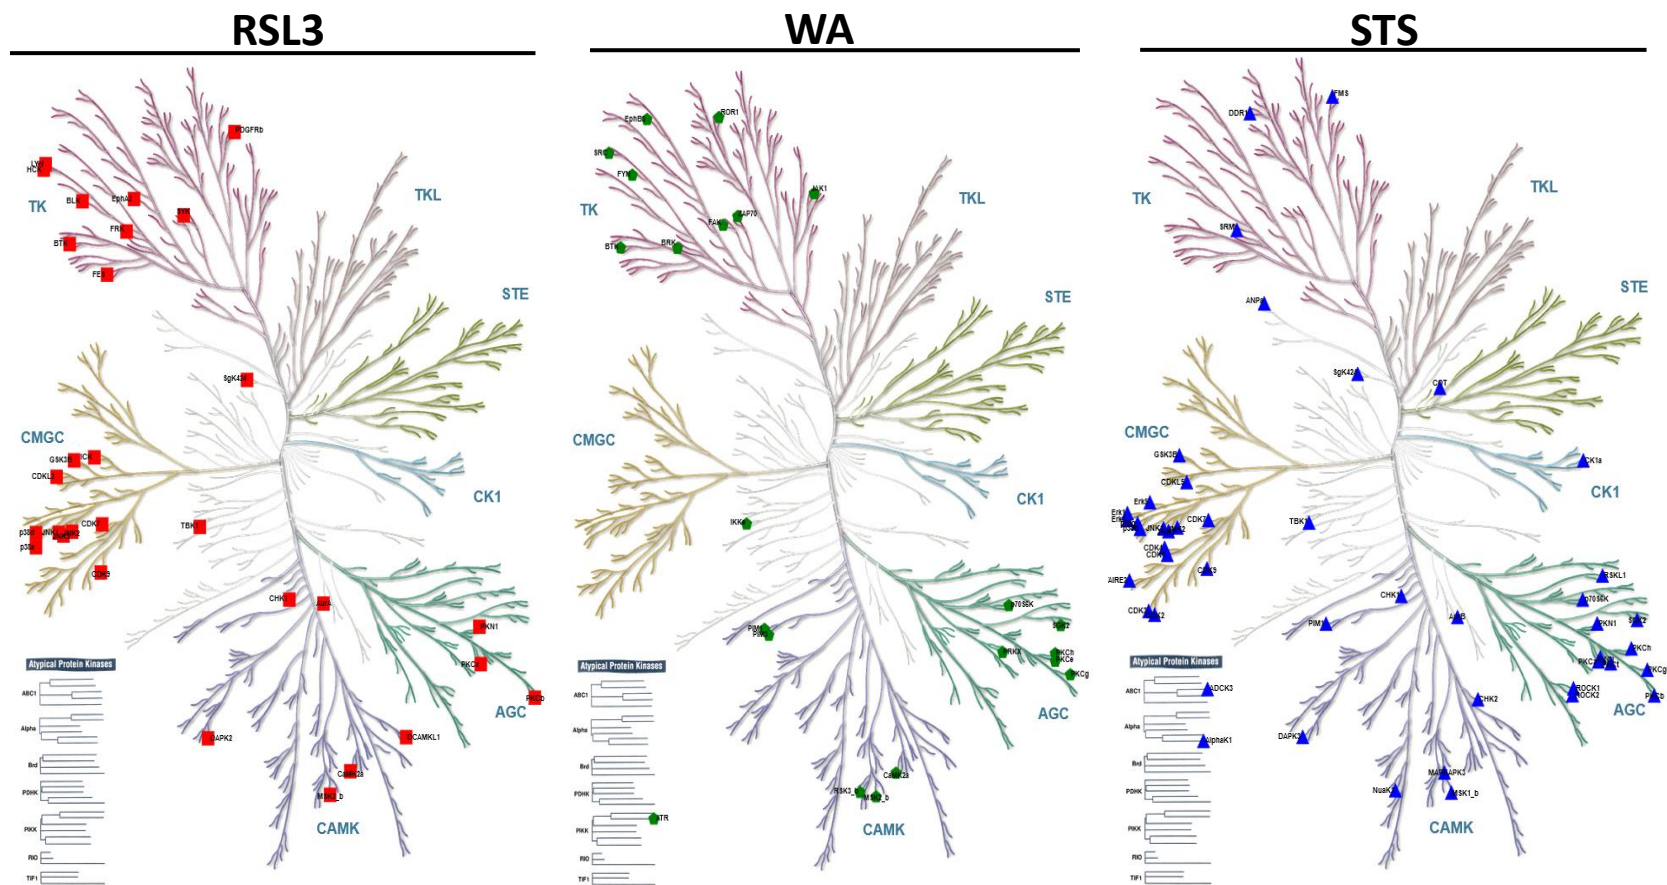

**Figure S6:** KinMap phylogenetic kinome tree. Kinases inhibited by RSL3 treatment are indicated by red squares (■) (left), kinases inhibited by STS treatment are marked as blue triangles (▲) (right), kinases inhibited by WA are indicated as green hexagons (◆). Only kinases with a mean final score  $\geq 1.3$  are included in the graph. Abbreviations: TK, tyrosine kinase group; TKL, tyrosine kinase-like group; STE, serine/threonine kinase group; CK1, casein kinase 1 group; AGC, protein kinase A, G, and C group; CAMK, Ca<sup>2+</sup>/calmodulin-dependent kinase group; CMGC, cyclin-dependent kinase, mitogen-activated protein kinase, glycogen synthase kinase, and CDC-like kinase group.

**Table S1.** Original images western blot analysis

| Figure                                                                                                                                               | Blot(s) with molecular marker                                                                                                                                                                                                      |
|------------------------------------------------------------------------------------------------------------------------------------------------------|------------------------------------------------------------------------------------------------------------------------------------------------------------------------------------------------------------------------------------|
| <p><b>1c:</b> Western blot detection and quantification of PARP-1 cleavage and GAPDH protein expression levels after STS treatment in MM1R cells</p> | <p><math>\alpha</math>-PARP-1 (full length 116 kDa<sup>*</sup>, cleaved 81 kDa<sup>+</sup>) and <math>\alpha</math>-GAPDH (37 kDa<sup>#</sup>)<br/> <i>marker:</i> Benchmark Pre-stained protein standard (Thermo, #10748-010)</p> |
| <p><b>S6:</b> Western blot detection and quantification of PARP-1 cleavage and GAPDH protein expression levels after WA treatment in MM1R cells</p>  | <p><math>\alpha</math>-PARP-1<br/> <i>marker:</i> Precision Plus Protein All Blue prestained protein standard (Bio-Rad, #1610373)</p>                                                                                              |

|                                                                                                                                                       |                                                                                                                                                                                                                                                                                                                                                                                                                                                    |
|-------------------------------------------------------------------------------------------------------------------------------------------------------|----------------------------------------------------------------------------------------------------------------------------------------------------------------------------------------------------------------------------------------------------------------------------------------------------------------------------------------------------------------------------------------------------------------------------------------------------|
|                                                                                                                                                       | <p><math>\alpha</math>-GAPDH</p> <p>Ctrl      3h WA      6h WA</p> 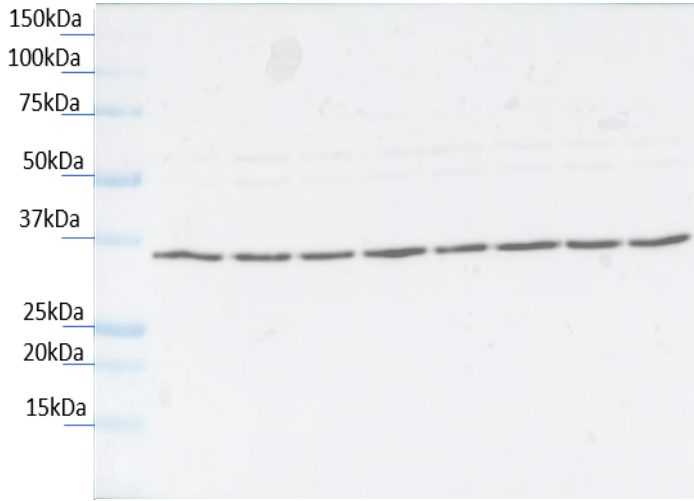 <p>150kDa<br/>100kDa<br/>75kDa<br/>50kDa<br/>37kDa<br/>25kDa<br/>20kDa<br/>15kDa</p> <p>#</p>                                                                                                                                                                                                |
| <p><b>S1:</b> Western blot detection and quantification of PARP-1 cleavage and GAPDH protein expression levels after RSL3 treatment in MM1R cells</p> | <p><math>\alpha</math>-PARP-1 (full length 116 kDa<sup>*</sup>, cleaved 81 kDa<sup>+</sup>) and <math>\alpha</math>-GAPDH (37 kDa<sup>#</sup>)<br/><i>marker:</i> Benchmark Pre-stained protein standard (Thermo, #10748-010)</p> <p>Ctrl      3h RSL3      6h RSL3</p> 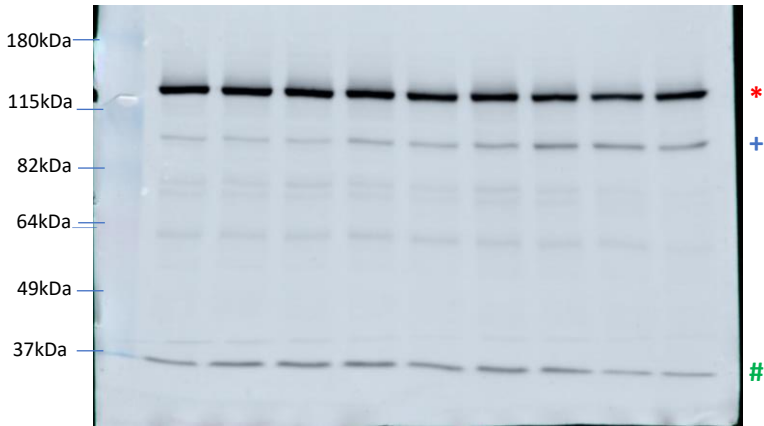 <p>180kDa<br/>115kDa<br/>82kDa<br/>64kDa<br/>49kDa<br/>37kDa</p> <p>*<br/>+<br/>#</p> |
